# Supplementary material
Source: PubMed Central journal article supplement (PMC3497465)

## Supplementary Material

Wall teichoic acids restrict access of bacteriophage endolysin Ply118, Ply511, and PlyP40 cell wall binding domains to the *Listeria monocytogenes* peptidoglycan

Marcel R. Eugster and Martin J. Loessner

**Table S1.** Primers used for PCR amplification and sequencing

| Purpose                                                                               | Primer            | Sequence (5' → 3') <sup>1</sup>                  |
|---------------------------------------------------------------------------------------|-------------------|--------------------------------------------------|
| construction of $\Delta lmo0959$<br>( $\Delta tagO1$ construct for serovar 1/2a)      | lmo0959_f_del_A   | ATCAG <u>AGCTC</u> AGCAATGTAATGAAAATTGAGC        |
|                                                                                       | lmo0959_r_del_B   | CGATAGGAGCGAATTAGCGGTGTAAGTAATACG                |
|                                                                                       | lmo0959_f_del_C   | CACCGCTAATTCGCTCCTATCGCCCATTAC                   |
|                                                                                       | lmo0959_r_del_D   | ATCAGGATCCGGTTGAGCCATTTCACTC                     |
| construction of $\Delta lmo2519$<br>( $\Delta tagO2$ construct for serovar 1/2a)      | lmo2519_f_del_A   | ATCAG <u>AGCTC</u> AACACCTTAACGCGGAGC            |
|                                                                                       | lmo2519_r_del_B   | CAGTAGGTATCATTATGCATCGAAAACGAAAATAAAAAAG         |
|                                                                                       | lmo2519_f_del_C   | CGTTTTTCGATGCATAATGATACCTACTGCAAAG               |
|                                                                                       | lmo2519_r_del_D   | ATCAGGATCCGCGTATTTGTTTGGACG                      |
| construction of $\Delta LMO1042_{0979}$<br>( $\Delta tagO1$ construct for serovar 4b) | lmo0979_f_del_A   | ATCAG <u>AGCTC</u> GTTACGGCGACCGTG               |
|                                                                                       | lmo0979_r_del_B   | GCGATATGTGCTAATTAGCGGTGTAAGTAATACGGAC            |
|                                                                                       | lmo0979_f_del_C   | CTTACACCGCTAATTAGCACATATCGCCCATTAC               |
|                                                                                       | lmo0979_r_del_D   | ATCAGGATCCGGTTGAGCCATTTCACTC                     |
| construction of $\Delta LMO1042_{2492}$<br>( $\Delta tagO2$ construct for serovar 4b) | lmo2492_f_del_A   | ATCAG <u>AGCTC</u> GTACACGACACATCGATAGTGATATC    |
|                                                                                       | lmo2492_r_del_B   | GCAGTTGGTATCCGACCAATCTTAAATTTACTTC               |
|                                                                                       | lmo2492_f_del_C   | GTAAATTTAAGATTGGTTCGGATACCAACTGCAAAGCTAATC       |
|                                                                                       | lmo2492_r_del_D   | ATCAGGATCCCTAAGGATTTTGTGGAGCATGC                 |
| pLiv2 construct for strain EGDe                                                       | lmo0959_pLiv2_for | ATAAGGATCCAATTTGCGGGGAGGACTAG                    |
|                                                                                       | lmo0959_pLiv2_rev | ATCA <u>CTGCAG</u> CAATCTCTAATCTATTTTTTCTTCTTTTG |
| pLiv2 construct for strain WSLC 1042                                                  | lmo0979_pLiv2_for | ATAAGGATCCAAAAATTTGCGGGGAGG                      |
|                                                                                       | lmo0979_pLiv2_rev | ATCA <u>CTGCAG</u> TCTCTAATCTATTTTTTCTTCTTTGG    |

<sup>1</sup> Restriction sites in sequences are underlined.

**Figure S1:** *Listeria* TagO1 and TagO2 homologues are highly similar and related to *Bacillus* and *Staphylococcus* proteins. The TagO1 and TagO2 amino acid sequences of *L. monocytogenes* strains EGDe and F2365 were aligned with the TagO proteins from *S. aureus* MN8 (GenBank sequence: accession no. ZP\_06948960), and *B. subtilis* 168 (NP\_391433). Black boxes indicate identical amino acids in all six proteins; residues conserved in five or four strains are indicated by dark and light grey background shading, respectively. Alignment was performed using CLC Main Workbench (Aarhus, Denmark). For *Listeria* gene identities, see Figure 1.

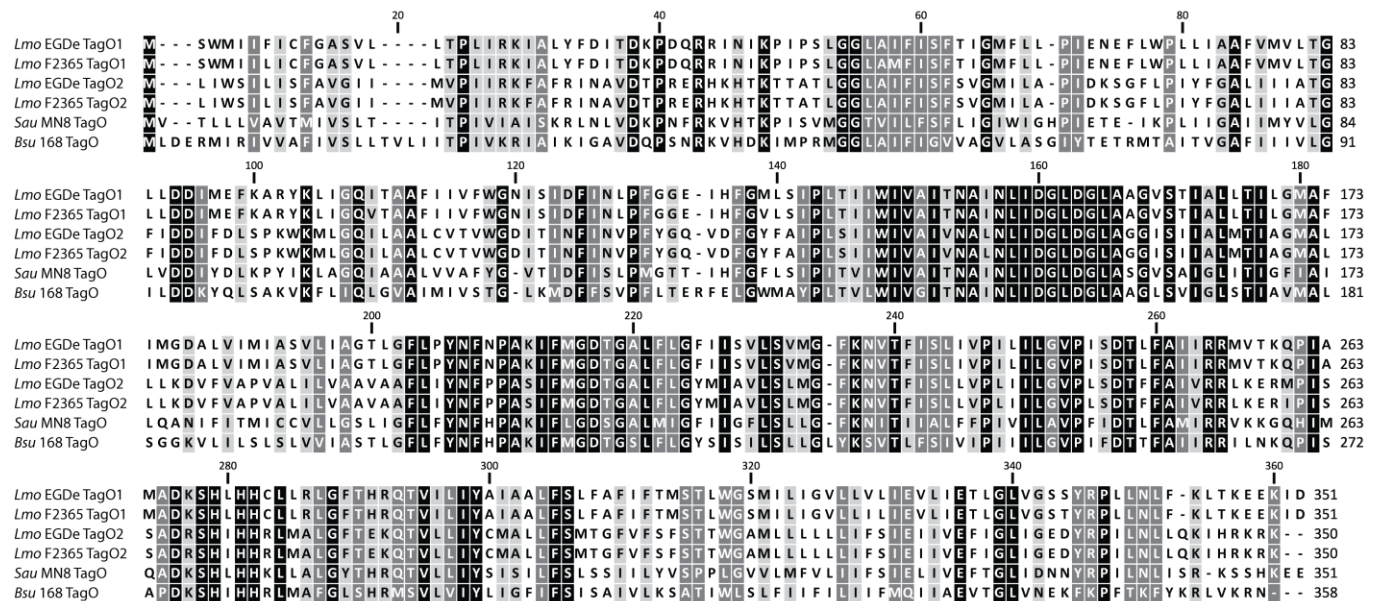

Supplement: JB.00808-12_zjb999092182so1.pdf [file JB.00808-12_zjb999092182so1.pdf]
